# Supplementary material
Source: Springer Nature journal article supplement (https://www.springermedizin.de/resource/supplementary/12879_2010_1340_MOESM2_ESM.pdf/9442388)

# Incidence per 100,000 py

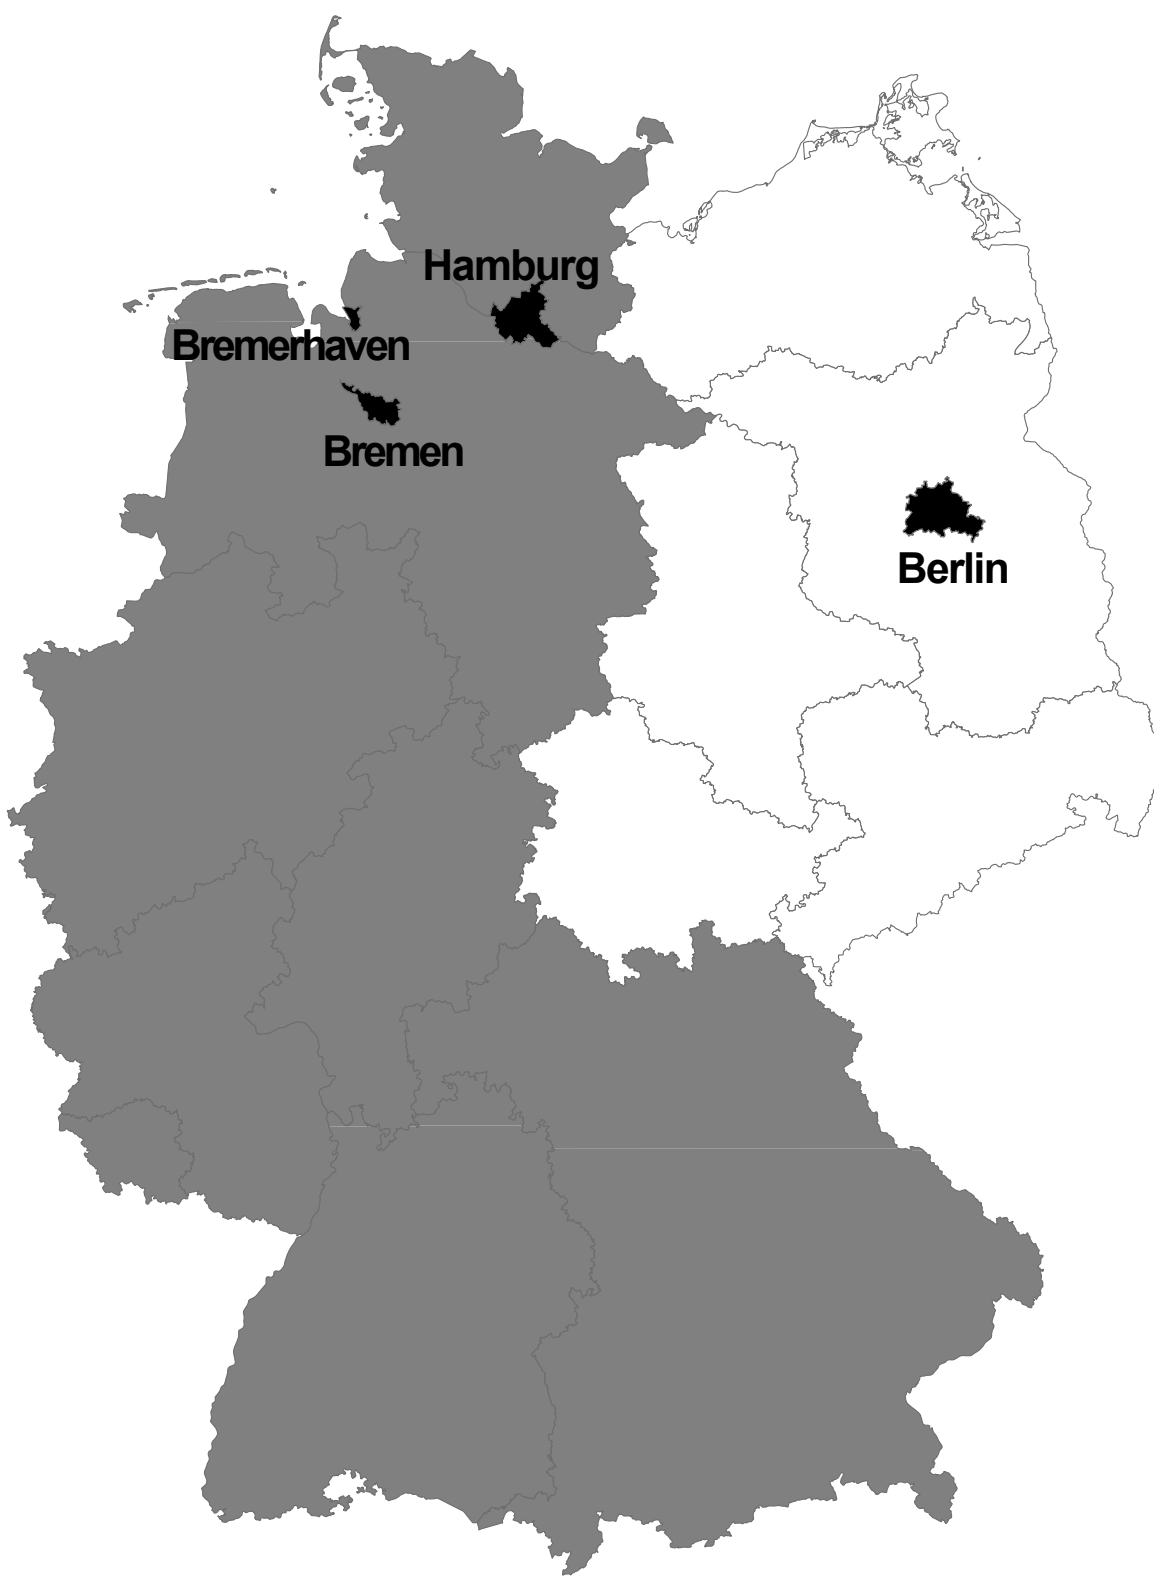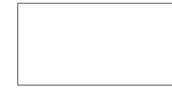

96 - 127

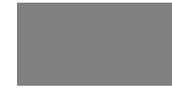

128 - 197

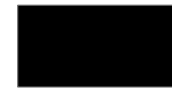

198 - 301

Supplement: MOESM2 [file 9442388]
